# Supplementary material
Source: PubMed Central journal article supplement (PMC8057645)
Supplement: BPA-22-765-s001.pdf [file BPA-22-765-s001.pdf]

Supplementary table 3. USF1 SNPs and haplotypes and their association with SP type and NFT prevalence (APOE4 carriership and age as covariates) in females.

|              | rs10908821           |      |           |       | rs2073658            |      |           |    | rs2774276            |      |           |       | rs2516839            |      |           |       | rs1556259            |      |           |       | rs2774279         |      |           |    |
|--------------|----------------------|------|-----------|-------|----------------------|------|-----------|----|----------------------|------|-----------|-------|----------------------|------|-----------|-------|----------------------|------|-----------|-------|-------------------|------|-----------|----|
|              | Aff. (%) CC*/G+      | OR   | CI        | p     | Aff. (%) CC*/T+      | OR   | CI        | p  | Aff. (%) CC*/G+      | OR   | CI        | p     | Aff. (%) TT*/C+      | OR   | CI        | p     | Aff. (%) AA*/G+      | OR   | CI        | p     | Aff. (%) CC*/T+   | OR   | CI        | p  |
| SP           | 59(39.1)/23(52.3)    | 2.95 | 1.25-6.96 | 0.014 | 35(41.7)/47(42.0)    | 1.03 | 0.53-2.00 | NS | 46(41.1)/36(42.4)    | 1.32 | 0.68-2.57 | NS    | 33(40.2)/49(43.4)    | 1.36 | 0.70-2.66 | NS    | 65(42.2)/16(39.0)    | 0.96 | 0.42-2.20 | NS    | 43(41.7)/39(42.9) | 0.98 | 0.51-1.90 | NS |
| Non neuritic | 19(12.8)/4(9.3)      | 1.20 | 0.35-4.07 | NS    | 8(9.9)/15(13.4)      | 1.41 | 0.54-3.65 | NS | 16(14.4)/7(8.4)      | 0.64 | 0.24-1.69 | NS    | 12(14.8)/11(9.9)     | 0.70 | 0.28-1.75 | NS    | 18(11.9)/5(12.2)     | 0.98 | 0.33-2.96 | NS    | 12(11.7)/11(12.5) | 1.10 | 0.44-2.75 | NS |
| Neuritic     | 35(23.5)/16(37.2)    | 3.27 | 1.29-8.29 | 0.013 | 22(27.2)/29(25.9)    | 0.96 | 0.45-2.05 | NS | 27(24.3)/24(28.9)    | 1.59 | 0.74-3.43 | NS    | 20(24.7)/31(27.9)    | 1.30 | 0.60-2.82 | NS    | 41(27.2)/9(22.0)     | 0.73 | 0.28-1.94 | NS    | 27(26.2)/24(27.3) | 1.04 | 0.49-2.22 | NS |
| Diffuse      | 5(3.4)/2(4.7)        | 2.33 | 0.40-13.6 | NS    | 4(4.9)/3(2.7)        | 0.55 | 0.12-2.58 | NS | 3(2.7)/4(4.8)        | 1.95 | 0.41-9.27 | NS    | 2(2.5)/5(4.5)        | 1.92 | 0.36-10.4 | NS    | 5(3.3)/2(4.9)        | 1.39 | 0.25-7.69 | NS    | 3(2.9)/4(4.5)     | 1.63 | 0.35-7.70 | NS |
| Primitive    | 14(9.4)/2(4.7)       | 0.83 | 0.17-4.09 | NS    | 4(4.9)/12(10.7)      | 2.28 | 0.68-7.63 | NS | 13(11.7)/3(3.6)      | 0.34 | 0.09-1.28 | NS    | 10(12.3)/6(5.4)      | 0.47 | 0.16-1.39 | NS    | 13(8.6)/3(7.3)       | 0.82 | 0.21-2.04 | NS    | 9(8.7)/7(8.0)     | 0.92 | 0.32-2.69 | NS |
| Classic      | 30(20.1)/10(23.3)    | 2.50 | 0.92-6.77 | NS    | 16(19.8)/24(21.4)    | 1.07 | 0.48-2.40 | NS | 24(21.6)/16(19.3)    | 1.22 | 0.54-2.75 | NS    | 21(18.9)/1(1.2)      | 0.97 | 0.44-2.17 | NS    | 33(21.9)/7(17.1)     | 0.73 | 0.26-2.04 | NS    | 20(19.4)/20(22.7) | 1.13 | 0.51-2.51 | NS |
| Burnt out    | 5(3.4)/6(14.0)       | 10.8 | 2.34-49.7 | 0.002 | 6(7.4)/5(4.5)        | 0.59 | 0.15-2.33 | NS | 3(2.7)/8(9.6)        | 6.56 | 1.36-31.5 | 0.019 | 1(1.2)/10(9.0)       | 9.20 | 1.04-81.6 | 0.046 | 8(5.3)/2(4.9)        | 0.66 | 0.11-3.98 | NS    | 7(6.8)/4(4.5)     | 0.73 | 0.18-2.94 | NS |
| Cerad ≤1.5%  | 24(15.9)/11(25.0)    | 3.20 | 1.20-8.51 | 0.020 | 17(20.2)/18(16.1)    | 0.84 | 0.38-1.89 | NS | 20(17.9)/15(17.6)    | 1.19 | 0.53-2.70 | NS    | 15(18.3)/20(17.7)    | 1.18 | 0.52-2.66 | NS    | 28(18.2)/6(14.6)     | 0.85 | 0.30-2.43 | NS    | 16(15.5)/19(20.9) | 1.29 | 0.58-2.90 | NS |
| Cerad >1.5%  | 35(23.2)/12(27.3)    | 2.66 | 0.98-7.22 | 0.055 | 18(21.4)/29(25.9)    | 1.24 | 0.56-2.75 | NS | 26(23.2)/21(24.7)    | 1.47 | 0.67-3.26 | NS    | 18(22.0)/29(25.7)    | 1.57 | 0.70-3.49 | NS    | 37(24.0)/10(24.4)    | 1.05 | 0.39-2.78 | NS    | 27(26.2)/20(22.0) | 0.77 | 0.35-1.70 | NS |
| NFT          | 71(55.5)/18(51.4)    | 0.95 | 0.39-2.32 | NS    | 34(50.0)/55(57.3)    | 1.38 | 0.67-2.86 | NS | 53(57.0)/37(51.4)    | 0.80 | 0.39-1.63 | NS    | 39(56.5)/50(53.2)    | 0.88 | 0.43-1.81 | NS    | 71(55.5)/17(48.6)    | 0.81 | 0.34-1.94 | NS    | 52(57.8)/37(51.4) | 0.78 | 0.38-1.60 | NS |
|              | Haplotype 2 (CCCTAT) |      |           |       | Haplotype 3 (CCCCGC) |      |           |    | Haplotype 4 (CCGCAC) |      |           |       | Haplotype 5 (CTCTAC) |      |           |       | Haplotype 7 (GCGCAC) |      |           |       |                   |      |           |    |
|              | Aff. (%) H2*/H2+     | OR   | CI        | p     | Aff. (%) H3*/H3+     | OR   | CI        | p  | Aff. (%) H4*/H4+     | OR   | CI        | p     | Aff. (%) H5*/H5+     | OR   | CI        | p     | Aff. (%) H7*/H7+     | OR   | CI        | p     |                   |      |           |    |
| SP           | 47(40.9)/39(42.4)    | 0.99 | 0.52-1.89 | NS    | 69(41.8)/17(40.5)    | 1.03 | 0.45-2.32 | NS | 69(43.1)/17(36.2)    | 0.74 | 0.35-1.56 | NS    | 35(41.7)/51(41.5)    | 1.01 | 0.53-1.94 | NS    | 63(38.7)/23(52.3)    | 2.93 | 1.25-6.85 | 0.013 |                   |      |           |    |
| Non neuritic | 14(11.9)/11(12.4)    | 1.05 | 0.43-2.54 | NS    | 20(12.1)/5(11.9)     | 0.99 | 0.33-2.95 | NS | 21(13.0)/4(8.7)      | 0.53 | 0.17-1.69 | NS    | 8(9.9)/17(13.5)      | 1.44 | 0.57-3.66 | NS    | 21(12.8)/4(9.3)      | 1.18 | 0.35-3.95 | NS    |                   |      |           |    |
| Neuritic     | 30(25.4)/24(27.0)    | 1.08 | 0.52-2.27 | NS    | 44(26.7)/10(23.8)    | 0.84 | 0.32-2.16 | NS | 44(27.3)/10(21.7)    | 0.73 | 0.30-1.76 | NS    | 22(27.2)/32(25.4)    | 0.92 | 0.43-1.94 | NS    | 38(23.2)/16(37.2)    | 3.35 | 1.32-8.47 | 0.011 |                   |      |           |    |
| Diffuse      | 3(2.5)/4(4.5)        | 1.82 | 0.39-8.56 | NS    | 5(3.0)/2(4.8)        | 1.53 | 0.28-8.45 | NS | 5(3.1)/2(4.3)        | 1.09 | 0.20-5.94 | NS    | 4(4.9)/3(2.4)        | 0.49 | 0.10-2.29 | NS    | 5(3.0)/2(4.7)        | 2.54 | 0.44-14.8 | NS    |                   |      |           |    |
| Primitive    | 11(9.3)/7(7.9)       | 0.83 | 0.30-2.34 | NS    | 15(9.1)/3(7.1)       | 0.80 | 0.21-3.06 | NS | 16(9.9)/2(4.3)       | 0.35 | 0.08-1.64 | NS    | 4(4.9)/14(11.1)      | 2.41 | 0.73-7.91 | NS    | 16(9.8)/2(4.7)       | 0.78 | 0.16-3.81 | NS    |                   |      |           |    |
| Classic      | 23(19.5)/20(22.5)    | 1.13 | 0.52-2.47 | NS    | 36(21.8)/7(16.7)     | 0.74 | 0.27-2.07 | NS | 36(22.4)/7(15.2)     | 0.61 | 0.23-1.61 | NS    | 16(19.8)/27(21.4)    | 1.05 | 0.47-2.33 | NS    | 33(20.1)/10(23.3)    | 0.52 | 0.93-6.83 | NS    |                   |      |           |    |
| Burnt out    | 7(5.9)/4(4.5)        | 0.88 | 0.22-3.50 | NS    | 8(4.8)/3(7.1)        | 1.20 | 0.25-5.71 | NS | 8(5.0)/3(6.5)        | 1.62 | 0.34-7.77 | NS    | 6(7.4)/5(4.0)        | 0.50 | 0.13-1.93 | NS    | 5(3.0)/6(14.0)       | 12.4 | 2.67-57.1 | 0.001 |                   |      |           |    |
| Cerad ≤1.5%  | 19(17.0)/19(20.7)    | 1.12 | 0.51-2.46 | NS    | 31(19.1)/7(16.7)     | 0.92 | 0.34-2.50 | NS | 32(20.4)/6(12.8)     | 0.51 | 0.19-1.40 | NS    | 17(20.2)/21(17.5)    | 0.95 | 0.43-2.08 | NS    | 27(16.9)/11(25.0)    | 2.94 | 1.12-7.73 | 0.029 |                   |      |           |    |
| Cerad >1.5%  | 27(24.1)/20(21.7)    | 0.80 | 0.36-1.75 | NS    | 37(22.8)/10(23.8)    | 1.05 | 0.40-2.78 | NS | 36(22.9)/11(23.4)    | 0.95 | 0.39-2.3  | NS    | 18(21.4)/29(24.2)    | 1.18 | 0.54-2.62 | NS    | 35(21.9)/12(27.3)    | 2.75 | 1.01-7.44 | 0.047 |                   |      |           |    |
| NFT          | 57(55.9)/38(52.1)    | 0.88 | 0.44-1.75 | NS    | 77(55.4)/18(50.0)    | 0.85 | 0.37-2.0  | NS | 74(55.6)/21(50.0)    | 0.75 | 0.35-1.63 | NS    | 34(50.0)/61(57.0)    | 1.35 | 0.67-2.72 | NS    | 77(55.0)/18(51.4)    | 0.96 | 0.40-2.31 | NS    |                   |      |           |    |

\*denotes the most common haplotype/homozygous genotype acting as the reference group in the analyses. Aff.(%) refers to number of individuals affected with SP/NFT.

USF1 - upstream transcription factor 1 gene, SNPs - single nucleotide polymorphisms, SP - senile plaques, NFT - neurofibrillary tangles, APOE4 - Apolipoprotein E ε4, OR - odds ratio, CI - confidence interval, p - p-value, NS - non significant p-value
