# Supplementary material
Source: PubMed Central journal article supplement (PMC8057645)
Supplement: BPA-22-765-s003.pdf [file BPA-22-765-s003.pdf]

Supplementary table 5. USF1 SNPs and haplotypes and their association with SP type and NFT prevalence (APOE4 carriership as a covariate) in over 65 year old.

|              | rs10908821           |      |           |       | rs2073658            |      |           |    | rs2774276            |      |           |       | rs2516839            |      |           |    | rs1556259            |      |           |       | rs2774279         |      |           |    |
|--------------|----------------------|------|-----------|-------|----------------------|------|-----------|----|----------------------|------|-----------|-------|----------------------|------|-----------|----|----------------------|------|-----------|-------|-------------------|------|-----------|----|
|              | Aff. (%) CC*/G+      | OR   | CI        | p     | Aff. (%) CC*/T+      | OR   | CI        | p  | Aff. (%) CC*/G+      | OR   | CI        | p     | Aff. (%) TT*/C+      | OR   | CI        | p  | Aff. (%) AA*/G+      | OR   | CI        | p     | Aff. (%) CC*/T+   | OR   | CI        | p  |
| SP           | 89(44.1)/43(61.4)    | 2.01 | 1.14-3.55 | 0.016 | 51(48.6)/80(48.2)    | 0.99 | 0.61-1.65 | NS | 72(47.7)/60(49.2)    | 1.08 | 0.66-1.77 | NS    | 49(45.0)/83(50.9)    | 1.23 | 0.75-2.03 | NS | 101(47.6)/29(50.0)   | 1.08 | 0.59-1.95 | NS    | 77(51.0)/55(45.5) | 0.80 | 0.49-1.31 | NS |
| Non neuritic | 20(10.1)/11(16.4)    | 2.05 | 0.88-4.75 | NS    | 10(9.9)/21(12.9)     | 1.41 | 0.62-3.23 | NS | 17(11.4)/14(12.0)    | 1.01 | 0.46-2.20 | NS    | 11(10.2)/20(12.7)    | 1.29 | 0.57-2.90 | NS | 23(11.2)/8(14.0)     | 1.37 | 0.55-3.38 | NS    | 21(14.2)/10(8.5)  | 0.54 | 0.24-1.22 | NS |
| Neuritic     | 64(32.3)/26(38.8)    | 1.52 | 0.82-2.82 | NS    | 34(33.7)/55(33.7)    | 1.08 | 0.62-1.88 | NS | 52(34.9)/38(32.5)    | 0.91 | 0.53-1.56 | NS    | 36(33.3)/54(34.4)    | 1.07 | 0.62-1.85 | NS | 68(33.0)/20(35.1)    | 1.16 | 0.60-2.24 | NS    | 51(34.5)/39(33.3) | 0.84 | 0.49-1.45 | NS |
| Diffuse      | 6(3.0)/3(4.5)        | 1.91 | 0.45-8.08 | NS    | 3(3.0)/6(3.7)        | 1.31 | 0.31-5.45 | NS | 5(3.4)/4(3.4)        | 0.99 | 0.25-3.82 | NS    | 6(3.8)/8(7.4)        | 1.48 | 0.36-6.17 | NS | 6(2.9)/3(5.3)        | 1.99 | 0.47-8.43 | NS    | 5(3.4)/4(3.4)     | 0.89 | 0.23-3.46 | NS |
| Primitive    | 14(7.1)/8(11.9)      | 2.11 | 0.81-5.52 | NS    | 7(6.9)/15(9.2)       | 1.46 | 0.56-3.82 | NS | 12(8.1)/10(8.5)      | 1.01 | 0.41-2.51 | NS    | 14(8.9)/27(25.0)     | 1.22 | 0.48-3.11 | NS | 17(8.3)/5(8.8)       | 1.14 | 0.39-3.38 | NS    | 16(10.8)/6(5.1)   | 0.42 | 0.16-1.15 | NS |
| Classic      | 47(23.7)/18(26.9)    | 1.44 | 0.72-2.87 | NS    | 23(22.8)/42(25.8)    | 1.21 | 0.65-2.25 | NS | 39(26.2)/27(23.1)    | 0.86 | 0.48-1.57 | NS    | 27(25.0)/38(24.2)    | 1.02 | 0.55-1.87 | NS | 49(23.8)/16(28.1)    | 1.30 | 0.64-2.63 | NS    | 37(25.0)/28(23.9) | 0.82 | 0.45-1.50 | NS |
| Burnt out    | 17(8.6)/8(11.9)      | 1.71 | 0.67-4.40 | NS    | 11(10.9)/13(8.0)     | 0.81 | 0.34-1.95 | NS | 13(8.7)/11(9.4)      | 1.03 | 0.43-2.46 | NS    | 9(8.3)/16(10.2)      | 1.21 | 0.50-2.95 | NS | 19(9.2)/4(7.0)       | 0.81 | 0.25-2.60 | NS    | 14(9.5)/11(9.4)   | 0.89 | 0.38-2.11 | NS |
| Cerad ≤1.5%  | 38(18.8)/18(25.7)    | 1.95 | 0.96-3.96 | NS    | 22(21.0)/34(20.5)    | 0.99 | 0.52-1.90 | NS | 33(21.9)/23(18.9)    | 0.89 | 0.47-1.69 | NS    | 22(20.2)/34(20.9)    | 1.11 | 0.58-2.10 | NS | 41(19.3)/14(24.1)    | 1.27 | 0.60-2.67 | NS    | 31(20.5)/25(20.7) | 0.92 | 0.49-1.73 | NS |
| Cerad >1.5%  | 51(25.2)/25(35.7)    | 2.06 | 1.07-3.93 | 0.030 | 29(27.6)/46(27.7)    | 1.00 | 0.56-1.80 | NS | 39(25.8)/37(30.3)    | 1.25 | 0.71-2.21 | NS    | 27(24.8)/49(30.1)    | 1.34 | 0.74-2.43 | NS | 60(28.3)/15(25.9)    | 0.94 | 0.46-1.92 | NS    | 46(30.5)/30(24.8) | 0.72 | 0.40-1.29 | NS |
| NFT          | 106(62.0)/39(66.1)   | 1.15 | 0.62-2.15 | NS    | 58(64.4)/87(62.6)    | 0.96 | 0.55-1.66 | NS | 81(64.8)/66(62.3)    | 0.88 | 0.51-1.51 | NS    | 57(62.6)/88(63.3)    | 0.98 | 0.56-1.70 | NS | 112(62.6)/32(65.3)   | 1.10 | 0.56-2.13 | NS    | 80(61.1)/65(65.7) | 1.26 | 0.73-2.18 | NS |
|              | Haplotype 2 (CCCTAT) |      |           |       | Haplotype 3 (CCCCGC) |      |           |    | Haplotype 4 (CCGCAC) |      |           |       | Haplotype 5 (CTCTAC) |      |           |    | Haplotype 7 (GCGCAC) |      |           |       |                   |      |           |    |
|              | Aff. (%) H2*/H2+     | OR   | CI        | p     | Aff. (%) H3*/H3+     | OR   | CI        | p  | Aff. (%) H4*/H4+     | OR   | CI        | p     | Aff. (%) H5*/H5+     | OR   | CI        | p  | Aff. (%) H7*/H7+     | OR   | CI        | p     |                   |      |           |    |
| SP           | 85(51.5)/55(45.5)    | 0.80 | 0.49-1.29 | NS    | 109(48.2)/31(51.7)   | 1.14 | 0.64-2.04 | NS | 116(52.5)/24(36.9)   | 0.56 | 0.32-1.01 | 0.053 | 53(48.6)/87(49.2)    | 1.01 | 0.62-1.65 | NS | 96(44.9)/44(61.1)    | 1.97 | 1.13-3.43 | 0.017 |                   |      |           |    |
| Non neuritic | 25(14.9)/10(8.5)     | 0.51 | 0.23-1.14 | NS    | 27(11.9)/8(13.6)     | 1.26 | 0.52-3.08 | NS | 30(13.5)/5(7.9)      | 0.46 | 0.17-1.26 | NS    | 10(9.5)/25(13.9)     | 1.59 | 0.71-3.57 | NS | 24(11.1)/11(15.9)    | 1.80 | 0.79-4.08 | NS    |                   |      |           |    |
| Neuritic     | 57(33.9)/39(33.3)    | 0.87 | 0.51-1.48 | NS    | 74(32.7)/22(37.3)    | 1.30 | 0.69-2.46 | NS | 80(36.0)/16(25.4)    | 0.56 | 0.29-1.09 | NS    | 36(34.3)/60(33.3)    | 1.03 | 0.60-1.76 | NS | 69(31.9)/27(39.1)    | 1.58 | 0.86-2.89 | NS    |                   |      |           |    |
| Diffuse      | 7(4.2)/4(3.4)        | 0.73 | 0.20-2.58 | NS    | 8(3.5)/3(5.1)        | 1.61 | 0.40-6.45 | NS | 10(4.5)/1(1.6)       | 0.27 | 0.03-2.16 | NS    | 3(2.9)/8(4.4)        | 1.67 | 0.42-6.53 | NS | 8(3.7)/3(4.3)        | 1.48 | 0.37-5.93 | NS    |                   |      |           |    |
| Primitive    | 18(10.7)/6(5.1)      | 0.43 | 0.16-1.15 | NS    | 19(8.4)/5(8.5)       | 1.12 | 0.38-3.27 | NS | 20(9.0)/4(6.3)       | 0.56 | 0.18-1.74 | NS    | 7(6.7)/17(9.4)       | 1.55 | 0.60-4.00 | NS | 16(7.4)/8(11.6)      | 1.96 | 0.76-5.03 | NS    |                   |      |           |    |
| Classic      | 43(25.6)/28(23.9)    | 0.82 | 0.46-1.48 | NS    | 55(24.3)/16(27.1)    | 1.28 | 0.64-2.58 | NS | 61(27.5)/10(15.9)    | 0.47 | 0.22-1.00 | 0.051 | 24(22.9)/47(26.1)    | 1.19 | 0.65-2.17 | NS | 52(24.1)/19(27.5)    | 1.49 | 0.77-2.90 | NS    |                   |      |           |    |
| Burnt out    | 14(8.3)/11(9.4)      | 1.01 | 0.43-2.39 | NS    | 19(8.4)/6(10.2)      | 1.34 | 0.48-3.69 | NS | 19(8.6)/6(9.5)       | 0.88 | 0.33-2.39 | NS    | 12(11.4)/13(7.2)     | 0.69 | 0.29-1.64 | NS | 17(7.9)/8(11.6)      | 1.84 | 0.72-4.70 | NS    |                   |      |           |    |
| Cerad ≤1.5%  | 35(21.7)/25(20.7)    | 0.85 | 0.46-1.58 | NS    | 45(20.3)/15(25.0)    | 1.28 | 0.62-2.63 | NS | 51(23.5)/9(13.8)     | 0.46 | 0.21-1.03 | 0.057 | 22(20.2)/38(22.0)    | 1.12 | 0.60-2.11 | NS | 42(20.0)/18(25.0)    | 1.76 | 0.88-3.53 | NS    |                   |      |           |    |
| Cerad >1.5%  | 48(29.8)/30(24.8)    | 0.74 | 0.42-1.31 | NS    | 62(27.9)/16(26.7)    | 1.02 | 0.51-2.05 | NS | 63(29.0)/15(23.1)    | 0.64 | 0.33-1.27 | NS    | 31(28.4)/47(27.2)    | 0.95 | 0.53-1.69 | NS | 52(24.8)/26(36.1)    | 2.13 | 1.12-4.04 | 0.020 |                   |      |           |    |
| NFT          | 90(59.6)/65(65.7)    | 1.36 | 0.80-2.31 | NS    | 122(61.3)/33(64.7)   | 1.14 | 0.60-2.17 | NS | 126(66.0)/29(49.2)   | 0.50 | 0.28-0.91 | 0.024 | 60(63.8)/95(60.9)    | 0.89 | 0.53-1.52 | NS | 114(60.3)/41(67.2)   | 1.32 | 0.72-2.44 | NS    |                   |      |           |    |

\*denotes the most common haplotype/homozygous genotype acting as the reference group in the analyses. Aff.(%) refers to number of individuals affected with SP/NFT.

USF1 – upstream transcription factor 1 gene, SNPs – single nucleotide polymorphisms, SP – senile plaques, NFT – neurofibrillary tangles, APOE4 – Apolipoprotein E ε4, OR – odds ratio, CI – confidence interval, p – p-value, NS – non significant p-value
