# Supplementary material
Source: PubMed Central journal article supplement (PMC8057645)
Supplement: BPA-22-765-s005.pdf [file BPA-22-765-s005.pdf]

Supplementary table 1. USF1 SNPs and haplotypes and their association with SP type and NFT prevalence (APOE4 carriership and age as covariates).

|              | rs10908821           |      |           |    | rs2073658            |      |           |    | rs2774276            |      |           |       | rs2516839            |      |           |    | rs1556259            |      |           |       | rs2774279          |      |           |    |
|--------------|----------------------|------|-----------|----|----------------------|------|-----------|----|----------------------|------|-----------|-------|----------------------|------|-----------|----|----------------------|------|-----------|-------|--------------------|------|-----------|----|
|              | Aff. (%) CC*/G+      | OR   | CI        | p  | Aff. (%) CC*/T+      | OR   | CI        | p  | Aff. (%) CC*/G+      | OR   | CI        | p     | Aff. (%) TT*/C+      | OR   | CI        | p  | Aff. (%) AA*/G+      | OR   | CI        | p     | Aff. (%) CC*/T+    | OR   | CI        | p  |
| SP           | 115(28.9)/47(36.2)   | 1.48 | 0.91-2.40 | NS | 65(30.1)/97(31.0)    | 1.08 | 0.71-1.66 | NS | 89(29.9)/74(31.5)    | 1.20 | 0.79-1.83 | NS    | 61(30.0)/101(31.0)   | 1.15 | 0.74-1.77 | NS | 124(31.2)/37(28.2)   | 0.96 | 0.58-1.58 | NS    | 93(31.4)/69(29.9)  | 0.83 | 0.54-1.28 | NS |
| Non neuritic | 37(9.4)/13(10.2)     | 1.16 | 0.58-2.30 | NS | 20(9.4)/31(10.0)     | 1.19 | 0.65-2.19 | NS | 25(8.4)/26(11.3)     | 1.34 | 0.74-2.43 | NS    | 17(8.4)/33(10.3)     | 1.23 | 0.65-2.31 | NS | 38(9.7)/13(10.0)     | 1.07 | 0.59-1.93 | NS    | 31(10.6)/19(8.4)   | 0.71 | 0.38-1.31 | NS |
| Neuritic     | 74(18.8)/27(21.3)    | 1.18 | 0.66-2.10 | NS | 37(17.5)/63(20.3)    | 1.29 | 0.77-2.16 | NS | 61(20.6)/40(17.4)    | 0.91 | 0.55-1.52 | NS    | 43(21.3)/58(18.1)    | 0.88 | 0.53-1.46 | NS | 77(19.6)/22(16.9)    | 0.81 | 0.42-1.58 | NS    | 58(19.8)/43(18.9)  | 0.81 | 0.49-1.35 | NS |
| Diffuse      | 14(3.6)/4(3.1)       | 0.94 | 0.30-2.94 | NS | 9(4.2)/10(3.2)       | 0.85 | 0.33-2.15 | NS | 6(2.0)/13(5.7)       | 2.76 | 1.02-7.45 | 0.045 | 4(2.0)/14(4.4)       | 2.19 | 0.70-6.82 | NS | 14(3.6)/5(3.8)       | 1.09 | 0.38-3.12 | NS    | 10(3.4)/8(3.5)     | 0.94 | 0.36-2.44 | NS |
| Primitive    | 23(5.8)/9(7.1)       | 1.29 | 0.57-2.94 | NS | 11(5.2)/21(6.8)      | 1.47 | 0.68-3.18 | NS | 19(6.4)/13(5.7)      | 0.89 | 0.42-1.87 | NS    | 13(6.4)/19(5.9)      | 0.93 | 0.44-1.96 | NS | 24(6.1)/8(6.2)       | 1.04 | 0.45-2.43 | NS    | 21(7.2)/11(4.8)    | 0.60 | 0.28-1.29 | NS |
| Classic      | 57(14.5)/19(15.0)    | 1.10 | 0.58-2.06 | NS | 26(12.3)/50(16.1)    | 1.46 | 0.83-2.57 | NS | 48(16.2)/29(12.6)    | 0.83 | 0.48-1.45 | NS    | 34(16.8)/42(13.1)    | 0.81 | 0.47-1.41 | NS | 58(14.8)/18(13.8)    | 0.99 | 0.52-1.88 | NS    | 44(15.0)/32(14.1)  | 0.79 | 0.45-1.36 | NS |
| Burnt out    | 17(4.3)/8(6.3)       | 1.48 | 0.58-3.79 | NS | 11(5.2)/13(4.2)      | 0.87 | 0.36-2.11 | NS | 13(4.4)/11(4.8)      | 1.21 | 0.50-2.92 | NS    | 9(4.5)/16(5.0)       | 1.11 | 0.45-2.73 | NS | 19(4.8)/4(3.1)       | 0.62 | 0.19-1.99 | NS    | 14(4.8)/11(4.8)    | 0.90 | 0.38-2.14 | NS |
| Cerad ≤1.5%  | 58(14.6)/21(16.2)    | 1.31 | 0.73-2.37 | NS | 33(15.3)/47(15.0)    | 1.06 | 0.63-1.78 | NS | 44(14.8)/36(15.3)    | 1.13 | 0.68-1.90 | NS    | 30(14.8)/49(15.0)    | 1.10 | 0.65-1.87 | NS | 59(14.8)/20(15.3)    | 1.07 | 0.59-1.93 | NS    | 45(15.2)/34(14.7)  | 0.86 | 0.51-1.45 | NS |
| Cerad >1.5%  | 57(14.3)/26(20)      | 1.70 | 0.93-3.11 | NS | 32(14.8)/50(16.0)    | 1.11 | 0.64-1.93 | NS | 45(15.1)/38(16.2)    | 1.32 | 0.76-2.27 | NS    | 31(15.3)/52(16.0)    | 1.20 | 0.69-2.10 | NS | 65(16.3)/17(13.0)    | 0.81 | 0.42-1.58 | NS    | 48(16.2)/35(15.2)  | 0.80 | 0.46-1.39 | NS |
| NFT          | 145(42.6)/44(41.1)   | 0.81 | 0.49-1.34 | NS | 75(40.5)/114(43.2)   | 1.18 | 0.76-1.82 | NS | 109(43.8)/83(40.7)   | 0.87 | 0.56-1.33 | NS    | 73(44.0)/116(41.1)   | 0.97 | 0.62-1.51 | NS | 143(42.7)/45(39.5)   | 1.03 | 0.63-1.70 | NS    | 105(41.2)/84(44.0) | 1.11 | 0.72-1.70 | NS |
|              | Haplotype 2 (CCCTAT) |      |           |    | Haplotype 3 (CCCCGC) |      |           |    | Haplotype 4 (CCGCAC) |      |           |       | Haplotype 5 (CTCTAC) |      |           |    | Haplotype 7 (GCGCAC) |      |           |       |                    |      |           |    |
|              | Aff. (%) H2*/H2+     | OR   | CI        | p  | Aff. (%) H3*/H3+     | OR   | CI        | p  | Aff. (%) H4*/H4+     | OR   | CI        | p     | Aff. (%) H5*/H5+     | OR   | CI        | p  | Aff. (%) H7*/H7+     | OR   | CI        | p     |                    |      |           |    |
| SP           | 103(32.3)/69(29.5)   | 0.80 | 0.53-1.22 | NS | 133(31.7)/39(29.1)   | 0.10 | 0.61-1.63 | NS | 139(32.3)/33(27.0)   | 0.82 | 0.50-1.35 | NS    | 67(30.3)/105(31.6)   | 1.09 | 0.71-1.66 | NS | 123(29.4)/49(36.3)   | 1.53 | 0.95-2.45 | NS    |                    |      |           |    |
| Non neuritic | 37(11.1)/19(8.3)     | 0.65 | 0.36-1.18 | NS | 43(10.0)/13(9.8)     | 1.02 | 0.52-2.01 | NS | 42(9.5)/14(11.7)     | 1.12 | 0.58-2.17 | NS    | 20(9.2)/36(10.4)     | 1.29 | 0.71-2.34 | NS | 42(9.7)/14(10.6)     | 1.17 | 0.6-2.27  | NS    |                    |      |           |    |
| Neuritic     | 65(19.5)/43(18.7)    | 0.82 | 0.5-1.34  | NS | 84(19.5)/24(18.0)    | 1.00 | 0.56-1.81 | NS | 91(20.5)/17(14.2)    | 0.71 | 0.38-1.32 | NS    | 39(18.0)/69(19.9)    | 1.21 | 0.73-1.99 | NS | 80(18.5)/28(21.2)    | 1.24 | 0.71-2.20 | NS    |                    |      |           |    |
| Diffuse      | 13(3.9)/8(3.5)       | 0.79 | 0.32-1.96 | NS | 16(3.7)/5(3.8)       | 1.04 | 0.37-2.94 | NS | 13(2.9)/8(6.7)       | 2.06 | 0.82-5.17 | NS    | 9(4.1)/12(3.5)       | 0.94 | 0.38-2.31 | NS | 16(3.7)/5(3.8)       | 1.09 | 0.39-3.08 | NS    |                    |      |           |    |
| Primitive    | 24(7.2)/11(4.8)      | 0.57 | 0.27-1.22 | NS | 27(6.3)/8(6.0)       | 1.01 | 0.44-2.34 | NS | 29(6.5)/6(5.0)       | 0.70 | 0.28-1.75 | NS    | 11(5.1)/24(6.9)      | 1.57 | 0.74-3.34 | NS | 26(6.0)/9(6.8)       | 1.22 | 0.54-2.74 | NS    |                    |      |           |    |
| Classic      | 51(15.3)/32(13.9)    | 0.77 | 0.45-1.32 | NS | 65(15.1)/18(13.5)    | 0.99 | 0.52-1.87 | NS | 72(16.2)/11(9.2)     | 0.57 | 0.28-1.17 | NS    | 27(12.4)/56(16.1)    | 1.41 | 0.81-2.44 | NS | 63(14.6)/20(15.2)    | 1.15 | 0.62-2.14 | NS    |                    |      |           |    |
| Burnt out    | 14(4.2)/11(4.8)      | 1.01 | 0.43-2.39 | NS | 19(4.4)/6(4.5)       | 1.05 | 0.38-2.88 | NS | 19(4.3)/6(5.0)       | 1.32 | 0.48-3.64 | NS    | 12(5.5)/13(3.7)      | 0.73 | 0.31-1.73 | NS | 17(3.9)/8(6.1)       | 1.63 | 0.64-4.15 | NS    |                    |      |           |    |
| Cerad ≤1.5%  | 51(16.2)/34(14.5)    | 0.78 | 0.47-1.29 | NS | 64(15.4)/21(15.7)    | 1.07 | 0.60-1.91 | NS | 67(15.7)/18(14.8)    | 0.86 | 0.47-1.56 | NS    | 33(14.9)/52(15.9)    | 1.16 | 0.70-1.94 | NS | 63(15.2)/22(16.3)    | 1.29 | 0.73-2.30 | NS    |                    |      |           |    |
| Cerad >1.5%  | 50(15.9)/35(15.0)    | 0.81 | 0.47-1.39 | NS | 67(16.1)/18(13.4)    | 0.87 | 0.45-1.68 | NS | 70(16.4)/15(12.3)    | 0.79 | 0.41-1.54 | NS    | 34(15.4)/51(15.5)    | 1.03 | 0.60-1.78 | NS | 58(14.0)/27(20.0)    | 1.82 | 0.99-3.32 | 0.050 |                    |      |           |    |
| NFT          | 119(41.0)/85(43.8)   | 1.13 | 0.74-1.71 | NS | 157(42.8)/47(40.2)   | 1.07 | 0.66-1.74 | NS | 162(43.5)/42(37.5)   | 0.77 | 0.48-1.25 | NS    | 78(41.4)/126(42.9)   | 1.12 | 0.73-1.70 | NS | 157(42.2)/47(42.0)   | 0.92 | 0.56-1.49 | NS    |                    |      |           |    |

\*denotes the most common haplotype/homozygous genotype acting as the reference group in the analyses. Aff.(%) refers to number of individuals affected with SP/NFT.

USF1 – upstream transcription factor 1 gene, SNPs – single nucleotide polymorphisms, SP – senile plaques, NFT – neurofibrillary tangles, APOE4 – Apolipoprotein E ε4, OR – odds ratio, CI – confidence interval, p – p-value, NS – non significant p-value
