# Supplementary material
Source: PubMed Central journal article supplement (PMC8057645)
Supplement: BPA-22-765-s009.pdf [file BPA-22-765-s009.pdf]

Supplementary table 2. USF1 SNPs and haplotypes and their association with SP type and NFT prevalence (APOE4 carriership and age as covariates) in males.

|              | rs10908821           |          |      |           | rs2073658            |          |          |      | rs2774276            |    |          |          | rs2516839            |           |       |          | rs1556259            |      |           |    | rs2774279 |          |      |           |    |          |          |      |           |    |
|--------------|----------------------|----------|------|-----------|----------------------|----------|----------|------|----------------------|----|----------|----------|----------------------|-----------|-------|----------|----------------------|------|-----------|----|-----------|----------|------|-----------|----|----------|----------|------|-----------|----|
|              | Aff. (%)             | CC*/G+   | OR   | CI        | p                    | Aff. (%) | CC*/T+   | OR   | CI                   | p  | Aff. (%) | CC*/G+   | OR                   | CI        | p     | Aff. (%) | TT*/C+               | OR   | CI        | p  | Aff. (%)  | AA*/G+   | OR   | CI        | p  | Aff. (%) | CC*/T+   | OR   | CI        | p  |
| SP           | 56(22.7)             | 24(27.9) | 1.12 | 0.60-2.09 | NS                   | 30(22.7) | 50(24.9) | 1.15 | 0.65-2.04            | NS | 43(23.1) | 38(25.3) | 1.13                 | 0.65-1.97 | NS    | 28(23.1) | 52(24.4)             | 1.02 | 0.57-1.82 | NS | 59(24.2)  | 21(23.3) | 0.97 | 0.51-1.84 | NS | 50(25.9) | 30(21.4) | 0.73 | 0.41-2.30 | NS |
| Non neuritic | 18(7.3)              | 9(10.7)  | 1.33 | 0.59-3.17 | NS                   | 12(9.2)  | 16(8.1)  | 1.02 | 0.46-2.28            | NS | 9(4.9)   | 19(12.9) | 2.53                 | 1.09-5.88 | 0.030 | 5(4.1)   | 22(10.5)             | 2.44 | 0.88-6.73 | NS | 20(8.3)   | 8(9.0)   | 1.11 | 0.46-2.68 | NS | 19(10.0) | 8(5.8)   | 0.49 | 0.20-1.18 | NS |
| Neuritic     | 39(15.9)             | 11(13.1) | 0.58 | 0.25-1.32 | NS                   | 15(11.5) | 34(17.2) | 1.71 | 0.83-3.53            | NS | 34(18.4) | 16(10.9) | 0.54                 | 0.26-1.11 | NS    | 23(19.0) | 27(12.9)             | 0.60 | 0.30-1.20 | NS | 36(14.9)  | 13(14.6) | 1.04 | 0.48-2.27 | NS | 31(16.3) | 19(13.7) | 0.69 | 0.34-1.37 | NS |
| Diffuse      | 9(3.7)               | 2(2.4)   | 0.61 | 0.13-2.95 | NS                   | 5(3.8)   | 7(3.5)   | 1.07 | 0.33-3.50            | NS | 3(1.6)   | 9(6.1)   | 3.64                 | 0.96-13.9 | 0.058 | 2(1.7)   | 9(4.3)               | 2.50 | 0.53-11.9 | NS | 9(3.7)    | 3(3.4)   | 0.91 | 0.24-3.51 | NS | 7(3.7)   | 4(2.9)   | 0.68 | 0.19-2.40 | NS |
| Primitive    | 9(3.7)               | 7(8.3)   | 2.02 | 0.71-5.77 | NS                   | 7(5.3)   | 9(4.5)   | 0.98 | 0.35-2.77            | NS | 6(3.2)   | 10(6.8)  | 1.99                 | 0.69-5.70 | NS    | 3(2.5)   | 13(6.2)              | 2.41 | 0.66-8.76 | NS | 11(4.6)   | 5(5.6)   | 1.29 | 0.42-3.90 | NS | 12(6.3)  | 4(2.9)   | 0.38 | 0.12-1.24 | NS |
| Classic      | 27(11.0)             | 9(10.7)  | 0.70 | 0.28-1.71 | NS                   | 10(7.6)  | 26(13.1) | 1.99 | 0.87-4.56            | NS | 24(13.0) | 13(8.8)  | 0.61                 | 0.28-1.34 | NS    | 15(12.4) | 21(10.0)             | 0.72 | 0.33-1.55 | NS | 25(10.4)  | 11(12.4) | 1.26 | 0.55-2.92 | NS | 24(12.6) | 12(8.6)  | 0.56 | 0.35-1.24 | NS |
| Burnt out    | 12(4.9)              | 2(2.4)   | 0.32 | 0.06-1.60 | NS                   | 5(3.8)   | 8(4.0)   | 1.15 | 0.35-3.82            | NS | 10(5.4)  | 3(2.0)   | 0.35                 | 0.09-1.38 | NS    | 8(6.6)   | 6(2.9)               | 0.38 | 0.12-1.22 | NS | 11(4.6)   | 2(2.2)   | 0.52 | 0.11-2.55 | NS | 7(3.7)   | 7(5.0)   | 1.12 | 0.36-3.46 | NS |
| Cerad ≤1.5%  | 34(13.8)             | 10(11.6) | 0.82 | 0.37-1.82 | NS                   | 16(12.1) | 29(14.4) | 1.28 | 0.64-2.56            | NS | 24(12.9) | 21(14.0) | 1.11                 | 0.57-2.15 | NS    | 15(12.4) | 29(13.6)             | 1.08 | 0.53-2.18 | NS | 31(12.7)  | 14(15.6) | 1.21 | 0.59-2.51 | NS | 29(15.0) | 15(10.7) | 0.63 | 0.31-1.28 | NS |
| Cerad >1.5%  | 22(8.9)              | 14(16.3) | 1.62 | 0.72-3.65 | NS                   | 14(10.6) | 21(10.4) | 0.97 | 0.44-2.15            | NS | 19(10.2) | 17(11.3) | 1.19                 | 0.55-2.58 | NS    | 13(10.7) | 23(10.8)             | 0.94 | 0.42-2.08 | NS | 28(11.5)  | 7(7.8)   | 0.64 | 0.24-1.67 | NS | 21(10.9) | 15(10.7) | 0.89 | 0.41-1.94 | NS |
| NFT          | 74(34.9)             | 26(36.1) | 0.80 | 0.43-1.49 | NS                   | 41(35.0) | 59(35.1) | 1.06 | 0.61-1.83            | NS | 56(35.9) | 46(34.8) | 0.91                 | 0.53-1.57 | NS    | 34(35.1) | 66(35.1)             | 1.05 | 0.60-1.87 | NS | 72(34.8)  | 28(35.4) | 1.16 | 0.63-2.13 | NS | 53(32.1) | 47(39.5) | 1.39 | 0.80-2.40 | NS |
|              | Haplotype 2 (CCCTAT) |          |      |           | Haplotype 3 (CCCCGC) |          |          |      | Haplotype 4 (CGGCAC) |    |          |          | Haplotype 5 (CTCTAC) |           |       |          | Haplotype 7 (GCGCAC) |      |           |    |           |          |      |           |    |          |          |      |           |    |
|              | Aff. (%)             | H2*/H2+  | OR   | CI        | p                    | Aff. (%) | H3*/H3+  | OR   | CI                   | p  | Aff. (%) | H4*/H4+  | OR                   | CI        | p     | Aff. (%) | H5*/H5+              | OR   | CI        | p  | Aff. (%)  | H7*/H7+  | OR   | CI        | p  |          |          |      |           |    |
| SP           | 56(27.5)             | 30(21.1) | 0.68 | 0.39-1.19 | NS                   | 64(25.2) | 22(23.9) | 0.99 | 0.52-1.85            | NS | 70(25.8) | 16(21.3) | 0.85                 | 0.44-1.66 | NS    | 32(23.4) | 54(25.8)             | 1.16 | 0.66-2.02 | NS | 60(23.5)  | 26(28.6) | 1.18 | 0.64-2.16 | NS |          |          |      |           |    |
| Non neuritic | 23(10.6)             | 8(5.7)   | 0.44 | 0.19-1.03 | NS                   | 23(8.6)  | 8(8.8)   | 1.04 | 0.44-2.48            | NS | 21(7.4)  | 10(13.5) | 1.75                 | 0.76-4.00 | NS    | 12(8.8)  | 19(8.6)              | 1.15 | 0.53-2.52 | NS | 21(7.8)   | 10(11.2) | 1.32 | 0.58-3.00 | NS |          |          |      |           |    |
| Neuritic     | 35(16.2)             | 19(13.5) | 0.68 | 0.34-1.32 | NS                   | 40(15.0) | 14(15.4) | 1.13 | 0.53-2.39            | NS | 47(16.6) | 7(9.5)   | 0.64                 | 0.26-1.56 | NS    | 17(12.5) | 37(16.7)             | 1.53 | 0.77-3.04 | NS | 42(15.7)  | 12(13.5) | 0.66 | 0.30-1.45 | NS |          |          |      |           |    |
| Diffuse      | 10(4.6)              | 4(2.8)   | 0.51 | 0.15-1.69 | NS                   | 11(4.1)  | 3(3.3)   | 0.80 | 0.22-3.00            | NS | 8(2.8)   | 6(8.1)   | 2.72                 | 0.89-8.29 | NS    | 5(3.7)   | 9(4.1)               | 1.31 | 0.42-4.07 | NS | 11(4.1)   | 3(3.4)   | 0.77 | 0.20-2.88 | NS |          |          |      |           |    |
| Primitive    | 13(6.0)              | 4(2.8)   | 0.38 | 0.12-1.23 | NS                   | 12(4.5)  | 5(5.5)   | 1.26 | 0.42-3.78            | NS | 13(4.6)  | 4(5.4)   | 1.14                 | 0.35-3.68 | NS    | 7(5.1)   | 10(4.5)              | 1.04 | 0.38-2.87 | NS | 10(3.7)   | 7(7.9)   | 1.91 | 0.68-5.31 | NS |          |          |      |           |    |
| Classic      | 28(13.0)             | 12(8.5)  | 0.54 | 0.25-1.17 | NS                   | 29(10.9) | 11(12.1) | 1.23 | 0.54-2.78            | NS | 36(12.7) | 4(5.4)   | 0.47                 | 0.15-1.42 | NS    | 11(8.1)  | 29(13.1)             | 1.85 | 0.84-4.06 | NS | 30(11.2)  | 10(11.2) | 0.80 | 0.34-1.85 | NS |          |          |      |           |    |
| Burnt out    | 7(3.2)               | 7(5.0)   | 1.22 | 0.39-3.76 | NS                   | 11(4.1)  | 3(3.3)   | 0.85 | 0.22-3.35            | NS | 11(3.9)  | 3(4.1)   | 1.25                 | 0.32-4.93 | NS    | 6(4.4)   | 8(3.6)               | 0.93 | 0.30-2.90 | NS | 12(4.5)   | 2(2.2)   | 0.35 | 0.07-1.71 | NS |          |          |      |           |    |
| Cerad ≤1.5%  | 32(15.8)             | 15(10.6) | 0.58 | 0.29-1.16 | NS                   | 33(13.0) | 14(15.2) | 1.17 | 0.57-2.41            | NS | 35(13.0) | 12(16.0) | 1.17                 | 0.55-2.48 | NS    | 16(11.7) | 31(14.9)             | 1.38 | 0.70-2.73 | NS | 36(14.2)  | 11(12.1) | 0.86 | 0.40-1.85 | NS |          |          |      |           |    |
| Cerad >1.5%  | 23(11.3)             | 15(10.6) | 0.86 | 0.40-1.86 | NS                   | 30(11.9) | 8(8.7)   | 0.73 | 0.29-1.85            | NS | 34(12.6) | 4(5.3)   | 0.48                 | 0.15-1.47 | NS    | 16(11.7) | 22(10.6)             | 0.87 | 0.40-1.87 | NS | 23(9.1)   | 15(16.5) | 1.78 | 0.80-3.96 | NS |          |          |      |           |    |
| NFT          | 62(33.0)             | 47(38.8) | 1.32 | 0.78-2.23 | NS                   | 80(35.1) | 29(35.8) | 1.19 | 0.66-2.14            | NS | 88(36.8) | 21(30.0) | 0.76                 | 0.41-1.41 | NS    | 44(36.1) | 65(34.8)             | 0.98 | 0.58-1.66 | NS | 80(34.5)  | 29(37.7) | 0.96 | 0.53-1.73 | NS |          |          |      |           |    |

\*denotes the most common haplotype/homozygous genotype acting as the reference group in the analyses. Aff.(%) refers to number of individuals affected with SP/NFT.

USF1 – upstream transcription factor 1 gene, SNPs – single nucleotide polymorphisms, SP – senile plaques, NFT – neurofibrillary tangles, APOE4 – Apolipoprotein E ε4, OR – odds ratio, CI – confidence interval, p – p-value, NS – non significant p-value
